# Supplementary material for: Atypical TDP‐43 protein expression in an ALS pedigree carrying a p.Y374X truncation mutation in TARDBP
Source: PubMed Central journal article supplement (PMC9836368; doi:10.1111/bpa.13104), 2022-07-24
Supplement: BPA-33-e13104-s001.pdf [file BPA-33-e13104-s001.pdf]

**Supplementary Table 1: Sequenced genes with no identified ALS-associated mutation in members of the Y374X-TDP-43 ALS pedigree**

|                  |
|------------------|
| <i>C9ORF72</i>   |
| <i>ALS2</i>      |
| <i>ANG</i>       |
| <i>ANXA11</i>    |
| <i>ARHGEF28</i>  |
| <i>ATXN2</i>     |
| <i>CHCHD10</i>   |
| <i>CHMP2B</i>    |
| <i>CYP27A1</i>   |
| <i>DAO</i>       |
| <i>DCTN1</i>     |
| <i>ERBB4</i>     |
| <i>EWSR1</i>     |
| <i>FIG4</i>      |
| <i>FUS</i>       |
| <i>GBA1</i>      |
| <i>GRN</i>       |
| <i>HNRNPA1</i>   |
| <i>HNRNPA2B1</i> |
| <i>MAPT</i>      |
| <i>MATR3</i>     |
| <i>NEFH</i>      |
| <i>NEK1</i>      |
| <i>OPTN</i>      |
| <i>PFN1</i>      |
| <i>PRPH</i>      |
| <i>SETX</i>      |
| <i>SIGMAR1</i>   |
| <i>SOD1</i>      |
| <i>SPAST</i>     |
| <i>SPG11</i>     |
| <i>SPG20</i>     |
| <i>SQSTM1</i>    |
| <i>SS18L1</i>    |
| <i>TAF15</i>     |
| <i>TBK1</i>      |
| <i>TUBA41</i>    |
| <i>UBQLN2</i>    |
| <i>VAPB</i>      |
| <i>VCP</i>       |
| <i>VPS54</i>     |
| <i>VRK1</i>      |
